# Supplementary material for: Longitudinal Chemical Gradients and the Functional Responses of Nutrients, Organic Matter, and Other Parameters to the Land Use Pattern and Monsoon Intensity
Source: MDPI journal article supplement (doi:10.3390/w14020237), 2022-01-14
Supplement: s1 [file s1]

Supplementary File

**Longitudinal Chemical Gradients and the Functional Responses of Nutrients, Organic Matter, and Other Parameters to the Land Use Pattern and Monsoon Intensity**

**Md Mamun, Ji Yoon Kim, Jeong-Eun Kim and Kwang-Guk An**

Table S1. Details of sampling sites, zones with coordinates of Han River watershed

| Site Zone                                 | Site | Site Name                     | Longitude | Latitude |
|-------------------------------------------|------|-------------------------------|-----------|----------|
| Headwater zone (Hz)                       | 1    | Songcheon2                    | 128.72    | 37.49    |
| Headwater zone (Hz)                       | 2    | Joyang River                  | 128.66    | 37.44    |
| Headwater zone (Hz)                       | 3    | Jeongseon 1                   | 128.67    | 37.38    |
| Headwater zone (Hz)                       | 4    | Jeongseon 2                   | 128.66    | 37.38    |
| Headwater zone (Hz)                       | 5    | Gwangha                       | 128.62    | 37.37    |
| Headwater zone (Hz)                       | 6    | Donggang River                | 128.51    | 37.21    |
| Headwater zone (Hz)                       | 7    | Yeongwol 1                    | 128.48    | 37.18    |
| Headwater zone (Hz)                       | 8    | Yeongwol 2                    | 128.50    | 37.16    |
| Headwater zone (Hz)                       | 9    | Youngchun                     | 128.49    | 37.08    |
| Headwater zone (Hz)                       | 10   | Gagok                         | 128.41    | 37.04    |
| Headwater zone (Hz)                       | 11   | Deokcheon Stream              | 128.39    | 37.01    |
| Headwater zone (Hz)                       | 12   | Monotone                      | 128.26    | 36.93    |
| Reservoir zone 1(Rz1; Chungju Reservoir   | 13   | Chungju Dam 4                 | 128.25    | 36.94    |
| Reservoir zone 1(Rz1; Chungju Reservoir   | 14   | Chungju Dam 2                 | 128.18    | 37.00    |
| Reservoir zone 1(Rz1; Chungju Reservoir   | 15   | Chungju Dam 3                 | 128.09    | 36.95    |
| Reservoir zone 1(Rz1; Chungju Reservoir   | 16   | Chungju Dam1                  | 128.00    | 37.00    |
| Midwater zone (Mz)                        | 17   | Chungju                       | 127.98    | 37.01    |
| Midwater zone (Mz)                        | 18   | Mokhaeng Bridge               | 127.92    | 37.02    |
| Midwater zone (Mz)                        | 19   | Chungju Adjustment Site Dam 2 | 127.87    | 37.02    |
| Midwater zone (Mz)                        | 20   | Chungju Adjustment Site Dam1  | 127.86    | 37.04    |
| Midwater zone (Mz)                        | 21   | Jungwon                       | 127.88    | 37.08    |
| Midwater zone (Mz)                        | 22   | Deok Eun-ri                   | 127.80    | 37.13    |
| Midwater zone (Mz)                        | 23   | Wonju-si                      | 127.75    | 37.20    |
| Midwater zone (Mz)                        | 24   | Gangchun                      | 127.69    | 37.27    |
| Midwater zone (Mz)                        | 25   | Yeoju 1                       | 127.65    | 37.30    |
| Midwater zone (Mz)                        | 26   | Dajing                        | 127.61    | 37.32    |
| Midwater zone (Mz)                        | 27   | Yeoju 2                       | 127.57    | 37.35    |
| Midwater zone (Mz)                        | 28   | Epo                           | 127.54    | 37.40    |
| Reservoir zone 2 (Rz2; Paldang Reservoir) | 29   | Paldang Dam1                  | 127.43    | 37.51    |

|                                           |    |               |        |       |
|-------------------------------------------|----|---------------|--------|-------|
| Reservoir zone 2 (Rz2; Paldang Reservoir) | 30 | Paldang Dam 3 | 127.37 | 37.53 |
| Reservoir zone 2 (Rz2; Paldang Reservoir) | 31 | Paldang Dam 2 | 127.29 | 37.52 |
| Downwater zone (Dz)                       | 32 | Paldang       | 127.24 | 37.54 |
| Downwater zone (Dz)                       | 33 | Dogok         | 127.22 | 37.57 |
| Downwater zone (Dz)                       | 34 | Domchion      | 127.21 | 37.58 |
| Downwater zone (Dz)                       | 35 | Guri          | 127.16 | 37.58 |
| Downwater zone (Dz)                       | 36 | Amsa          | 127.14 | 37.57 |
| Downwater zone (Dz)                       | 37 | Guui          | 127.12 | 37.54 |
| Downwater zone (Dz)                       | 38 | Jamsil        | 127.10 | 37.53 |
| Downwater zone (Dz)                       | 39 | Tukdo         | 127.04 | 37.53 |
| Downwater zone (Dz)                       | 40 | Bokgwang      | 127.02 | 37.53 |
| Downwater zone (Dz)                       | 41 | Noryangjin    | 126.96 | 37.52 |
| Downwater zone (Dz)                       | 42 | Yeongdeungpo  | 126.90 | 37.55 |
| Downwater zone (Dz)                       | 43 | Gayang        | 126.86 | 37.57 |
| Downwater zone (Dz)                       | 44 | Angri         | 126.82 | 37.60 |
| Downwater zone (Dz)                       | 45 | Kimpo         | 126.80 | 37.60 |
| Downwater zone (Dz)                       | 46 | Paju          | 126.72 | 37.65 |

Table S2. Land use coverage data of the studied sites.

| Sites | Name             | Agricultural (%) | Urban (%) | Forest (%) |
|-------|------------------|------------------|-----------|------------|
| 1     | Songcheon2       | 6.62             | 0.07      | 93.31      |
| 2     | Joyang River     | 6.03             | 0.91      | 93.06      |
| 3     | Jeongseon 1      | 9.28             | 2.37      | 88.35      |
| 4     | Jeongseon 2      | 5.42             | 1.73      | 92.85      |
| 5     | Gwangha          | 6.33             | 0.15      | 93.52      |
| 6     | Donggang River   | 4.66             | 0.27      | 95.07      |
| 7     | Yeongwol 1       | 7.11             | 15.19     | 77.71      |
| 8     | Yeongwol 2       | 5.68             | 0.50      | 93.83      |
| 9     | Youngchun        | 21.19            | 2.17      | 76.64      |
| 10    | Gagok            | 7.86             | 0.30      | 91.84      |
| 11    | Deokcheon Stream | 11.42            | 0.61      | 87.97      |

|    |                               |       |       |       |
|----|-------------------------------|-------|-------|-------|
| 12 | Monotone                      | 11.37 | 0.03  | 88.61 |
| 15 | Chungju Dam 3                 | 10.28 | 0.09  | 89.63 |
| 17 | Chungju                       | 11.47 | 3.93  | 84.59 |
| 18 | Mokhaeng Bridge               | 30.90 | 28.12 | 40.97 |
| 19 | Chungju Adjustment Site Dam 2 | 38.45 | 7.53  | 54.02 |
| 20 | Chungju Adjustment Site Dam1  | 43.49 | 2.88  | 53.63 |
| 21 | Jungwon                       | 33.59 | 1.87  | 64.54 |
| 22 | Deok Eun-ri                   | 13.61 | 0.14  | 86.25 |
| 23 | Wonju-si                      | 17.83 | 0.53  | 81.65 |
| 24 | Gangchun                      | 41.65 | 2.78  | 55.57 |
| 25 | Yeoju 1                       | 53.25 | 21.07 | 25.68 |
| 26 | Dajing                        | 46.22 | 0.64  | 53.14 |
| 27 | Yeoju 2                       | 95.57 | 4.19  | 0.24  |
| 28 | Epo                           | 50.96 | 14.61 | 34.44 |
| 29 | Paldang Dam1                  | 30.74 | 1.64  | 67.63 |
| 30 | Paldang Dam 3                 | 13.61 | 0.81  | 85.58 |
| 31 | Paldang Dam 2                 | 16.94 | 2.01  | 81.05 |
| 32 | Paldang                       | 7.78  | 6.13  | 86.08 |
| 33 | Dogok                         | 18.15 | 4.73  | 77.12 |
| 34 | Domchion                      | 57.65 | 41.76 | 0.59  |
| 35 | Guri                          | 23.12 | 76.03 | 0.85  |
| 38 | Jamsil                        | 6.53  | 59.20 | 34.28 |
| 39 | Tukdo                         | 0.05  | 97.53 | 2.42  |
| 40 | Bokgwang                      | 0.00  | 90.81 | 9.19  |
| 41 | Noryangjin                    | 0.00  | 95.33 | 4.67  |
| 42 | Yeongdeungpo                  | 0.00  | 99.18 | 0.82  |
| 43 | Gayang                        | 0.00  | 90.33 | 9.67  |

|    |       |       |       |       |
|----|-------|-------|-------|-------|
| 44 | Angri | 16.65 | 49.28 | 34.07 |
| 45 | Kimpo | 77.47 | 14.95 | 7.58  |
| 46 | Paju  | 52.25 | 16.45 | 31.30 |

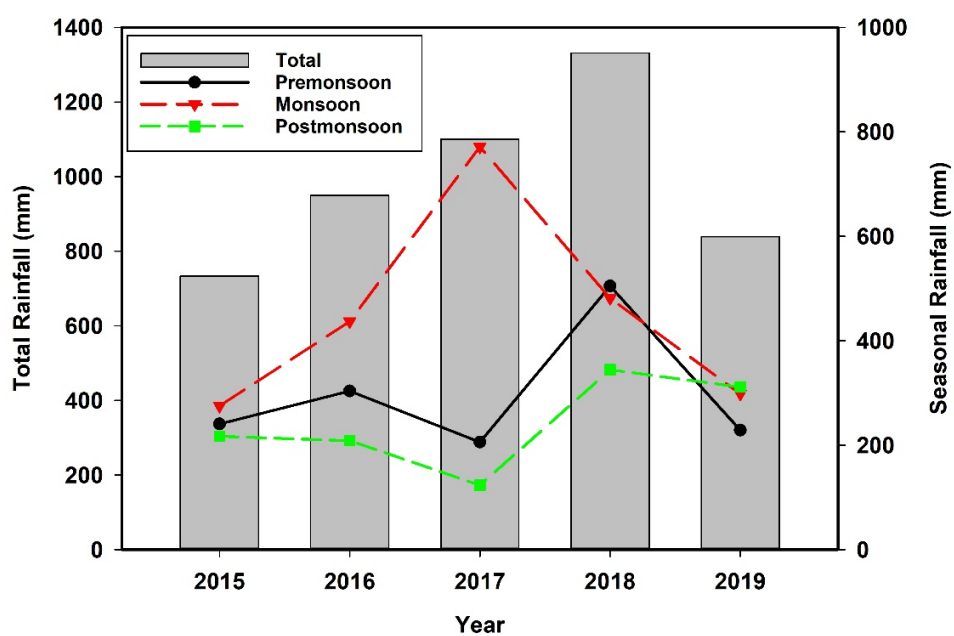

Figure S1. Annual and seasonal rainfall pattern of the study area.

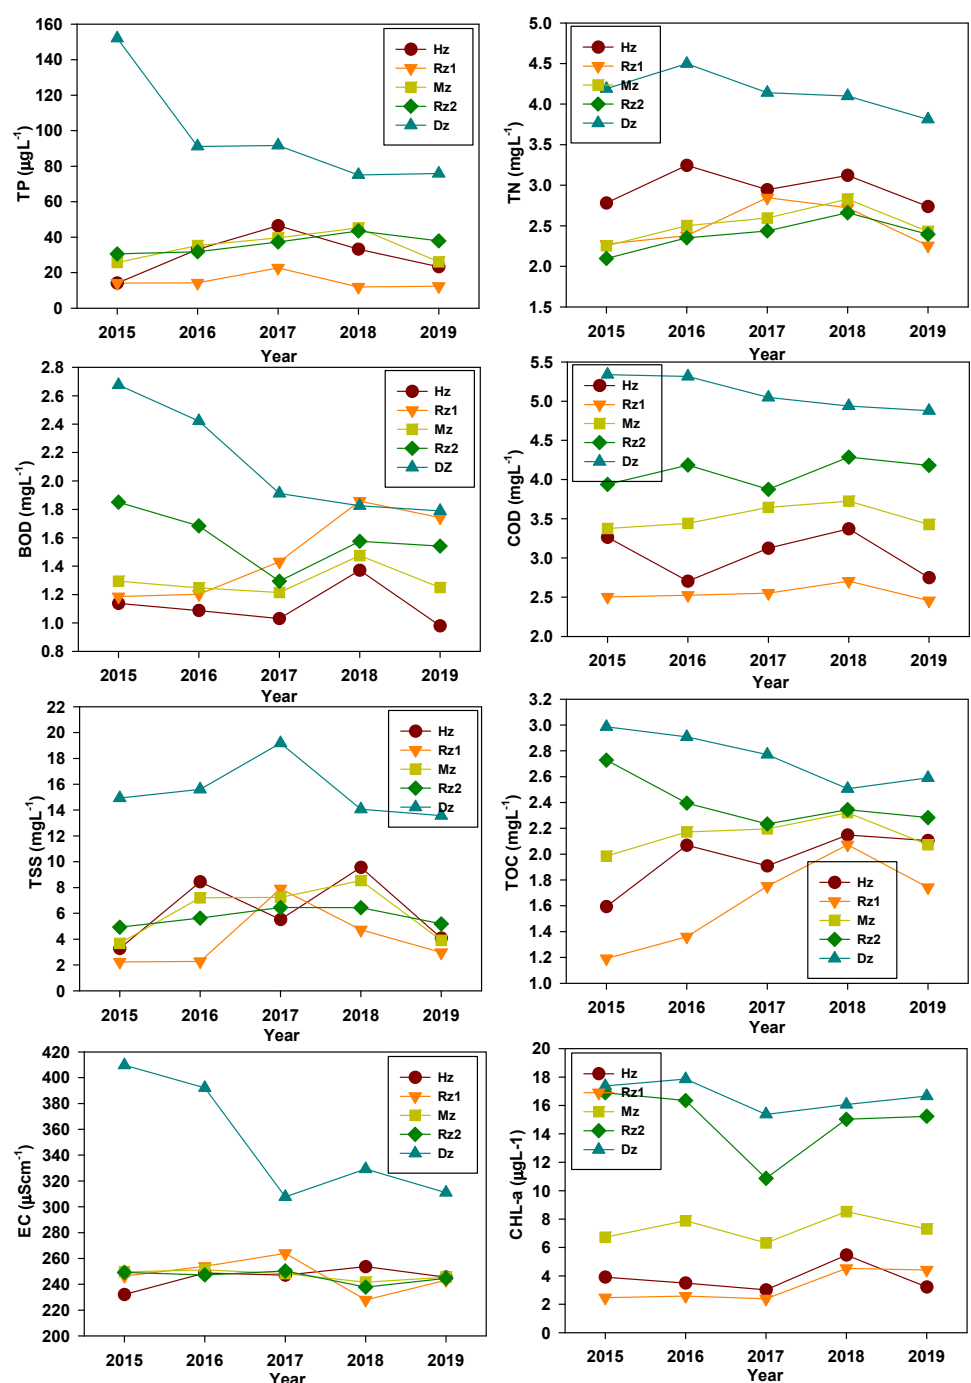

Figure S2. Annual variations of water quality parameters in the Han River. (Hz: headwater zone, Rz1: reservoir zone 1, Mz: midwater zone, Rz2: reservoir zone 2, and Dz: downwater zone, TP: total phosphorus, TN: total nitrogen, BOD: biological oxygen demand, COD: chemical oxygen demand, TSS: total suspended solids, TOC: total organic carbon, EC: electrical conductivity, and CHL-a: chlorophyll-a).

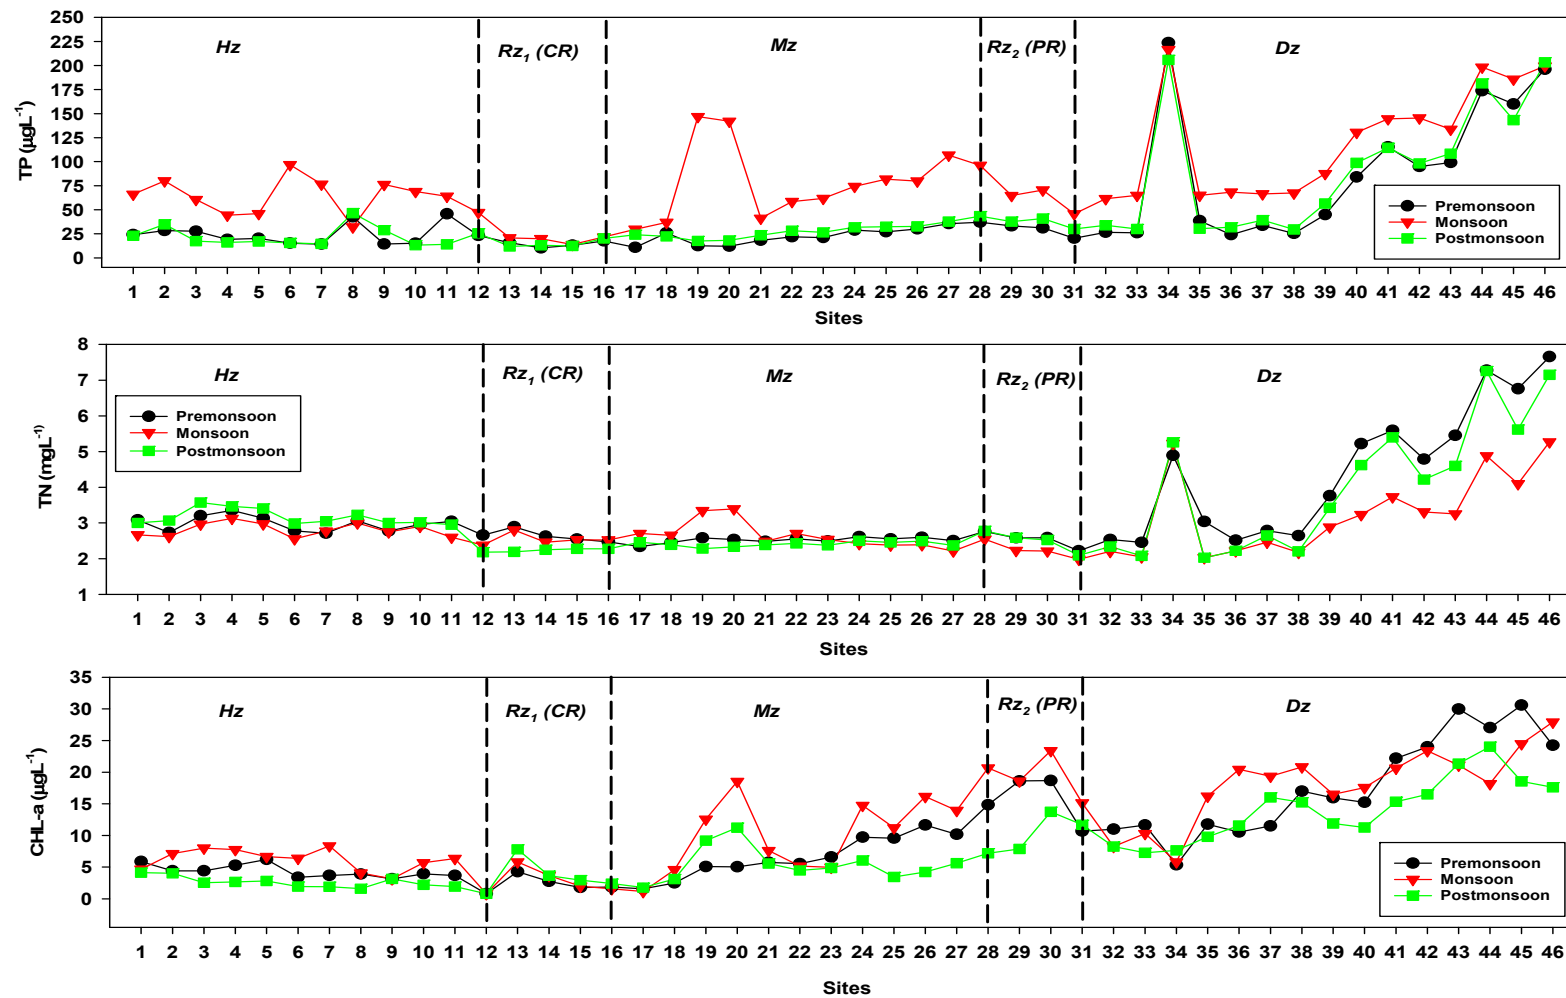

Figure S3. Seasonal variations of TP, TN and CHL-a from Hz to Dz in the HRB (Hz: headwater zone,  $Rz_1$  (CR): reservoir zone 1 (Chugju Reservoir), Mz: midwater zone,  $Rz_2$  (PR): reservoir zone 2 (Paldang Reservoir), and Dz: downwater zone; HRB: Han River basin).

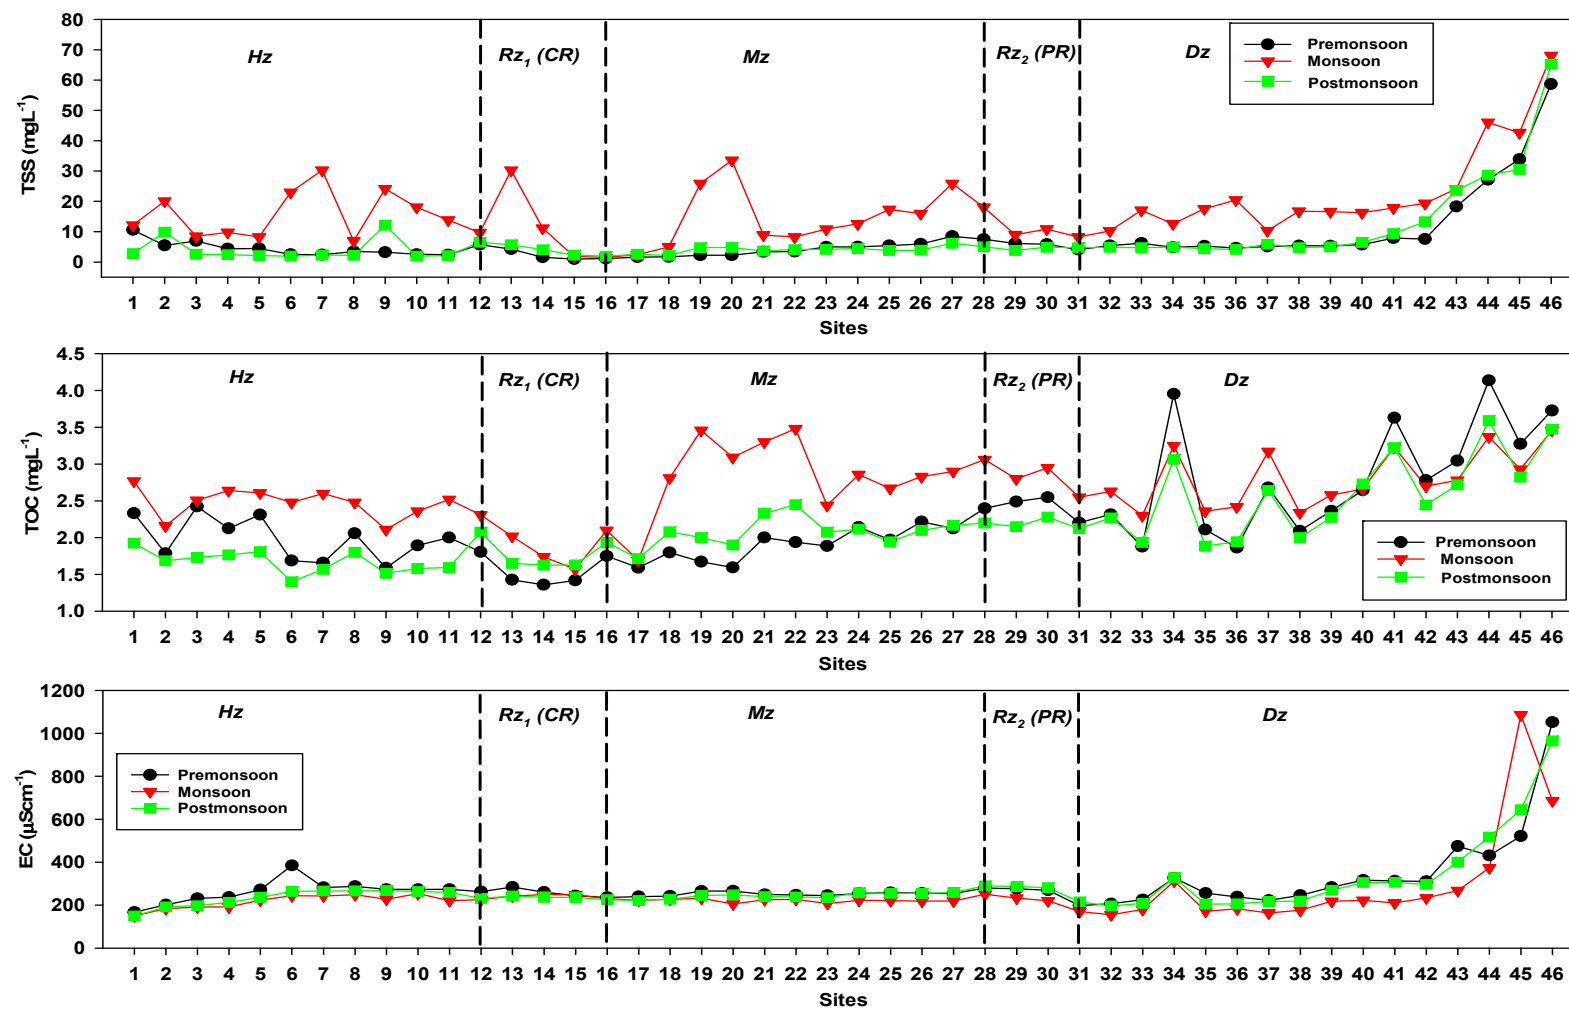

Figure S4. Seasonal variations of TSS, TOC and EC from Hz to Dz in the HRB (Hz: headwater zone,  $Rz_1$  (CR): reservoir zone 1 (Chugju Reservoir), Mz: midwater zone,  $Rz_2$  (PR): reservoir zone 2 (Paldang Reservoir), and Dz: downwater zone; HRB: Han River basin).

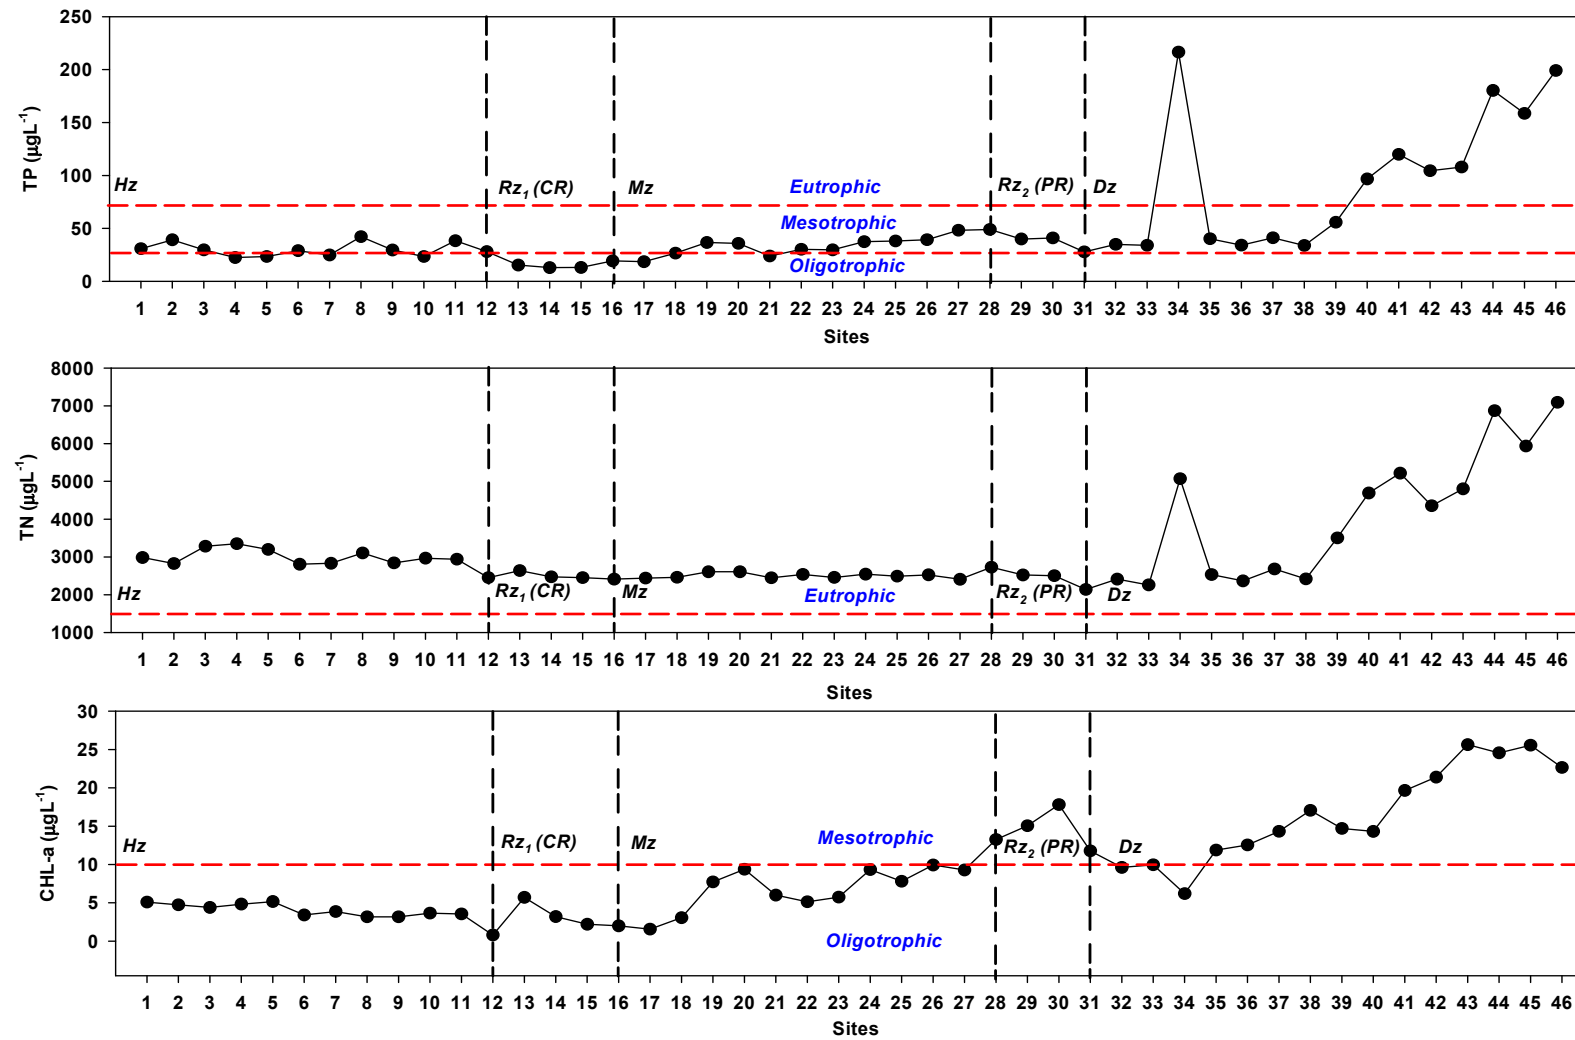

Figure S5. Trophic state condition of Han River. (Hz: headwater zone, Rz<sub>1</sub> (CR): reservoir zone 1 (Chugju Reservoir), Mz: midwater zone, Rz<sub>2</sub> (PR): reservoir zone 2 (Paldang Reservoir), Dz: downwater zone, TP: total phosphorus, TN: total nitrogen, and CHL-a: chlorophyll-a).



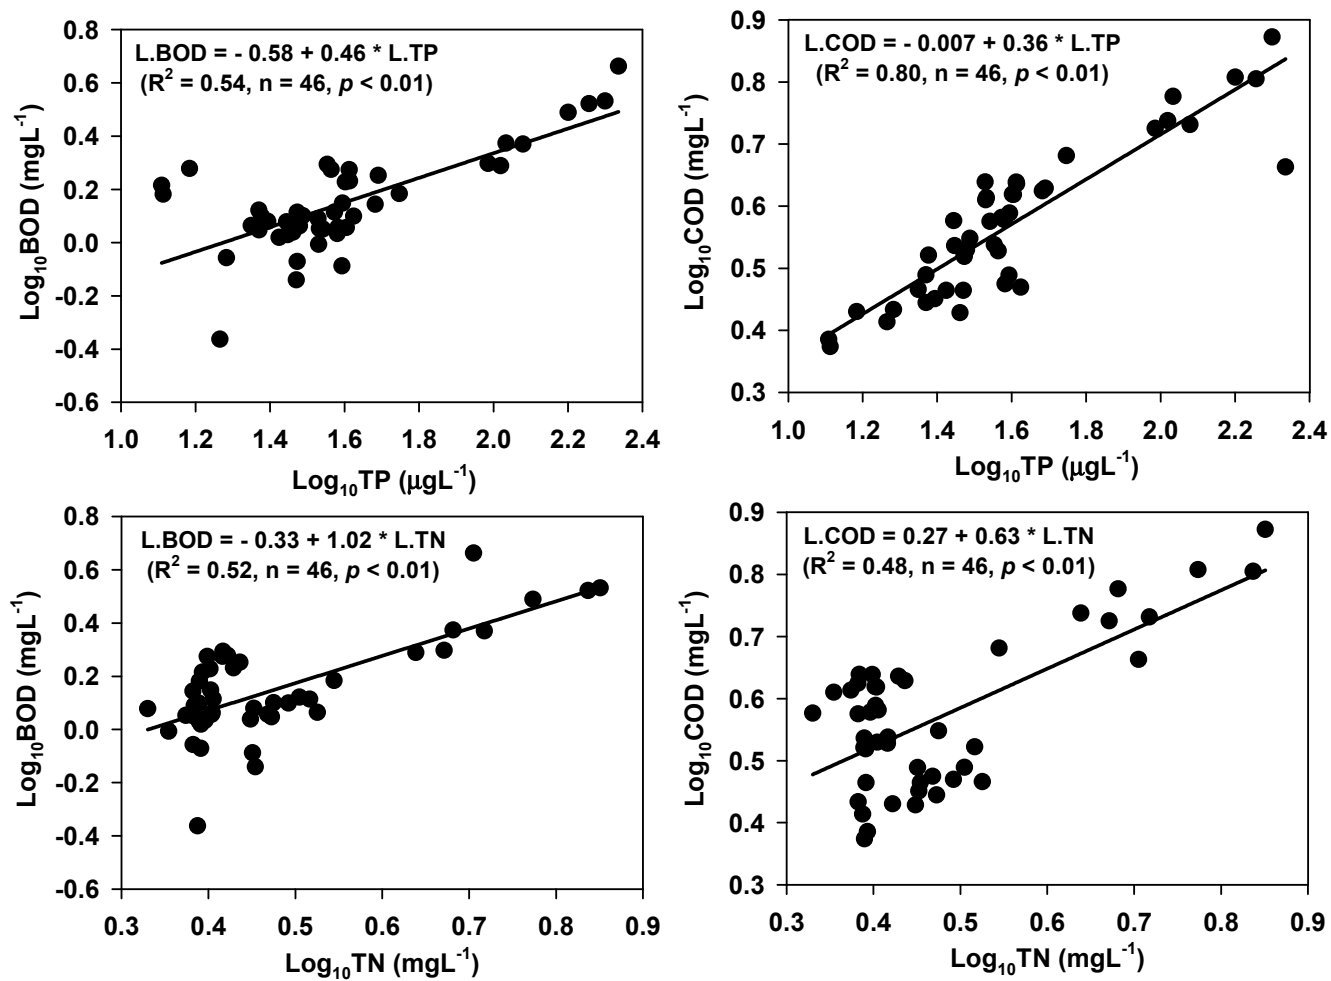

Figure S6. Relations among nutrients (TP: total phosphorus and TN: total nitrogen) and organic matters (BOD: biological oxygen demand and COD: chemical oxygen demand) in the Han River.

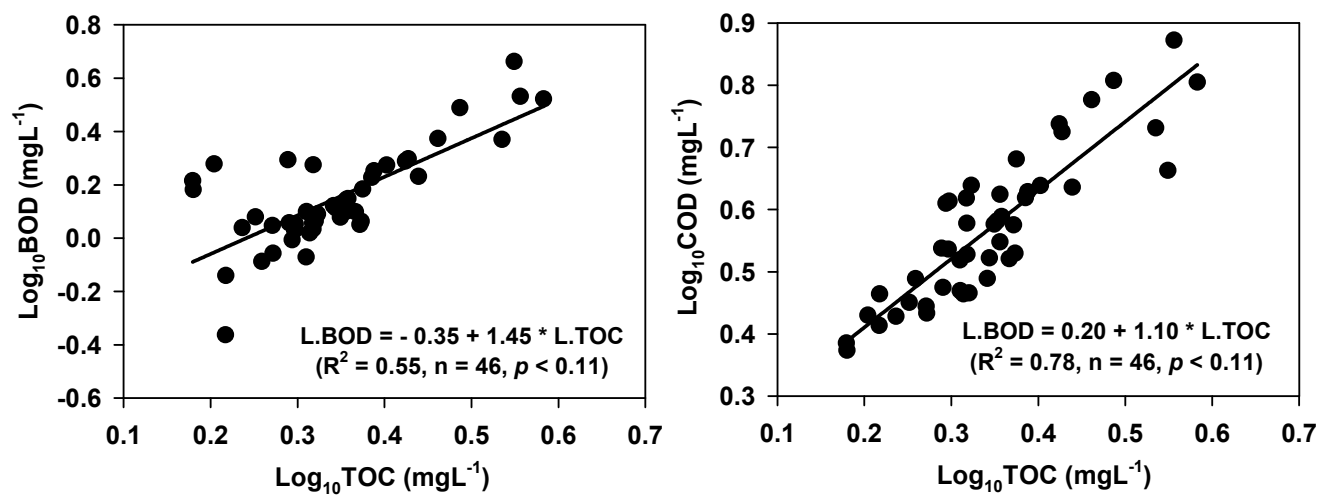

Figure S7. Relations among TOC (total organic carbon), BOD (biological oxygen demand) and COD (chemical oxygen demand) in the Han River.

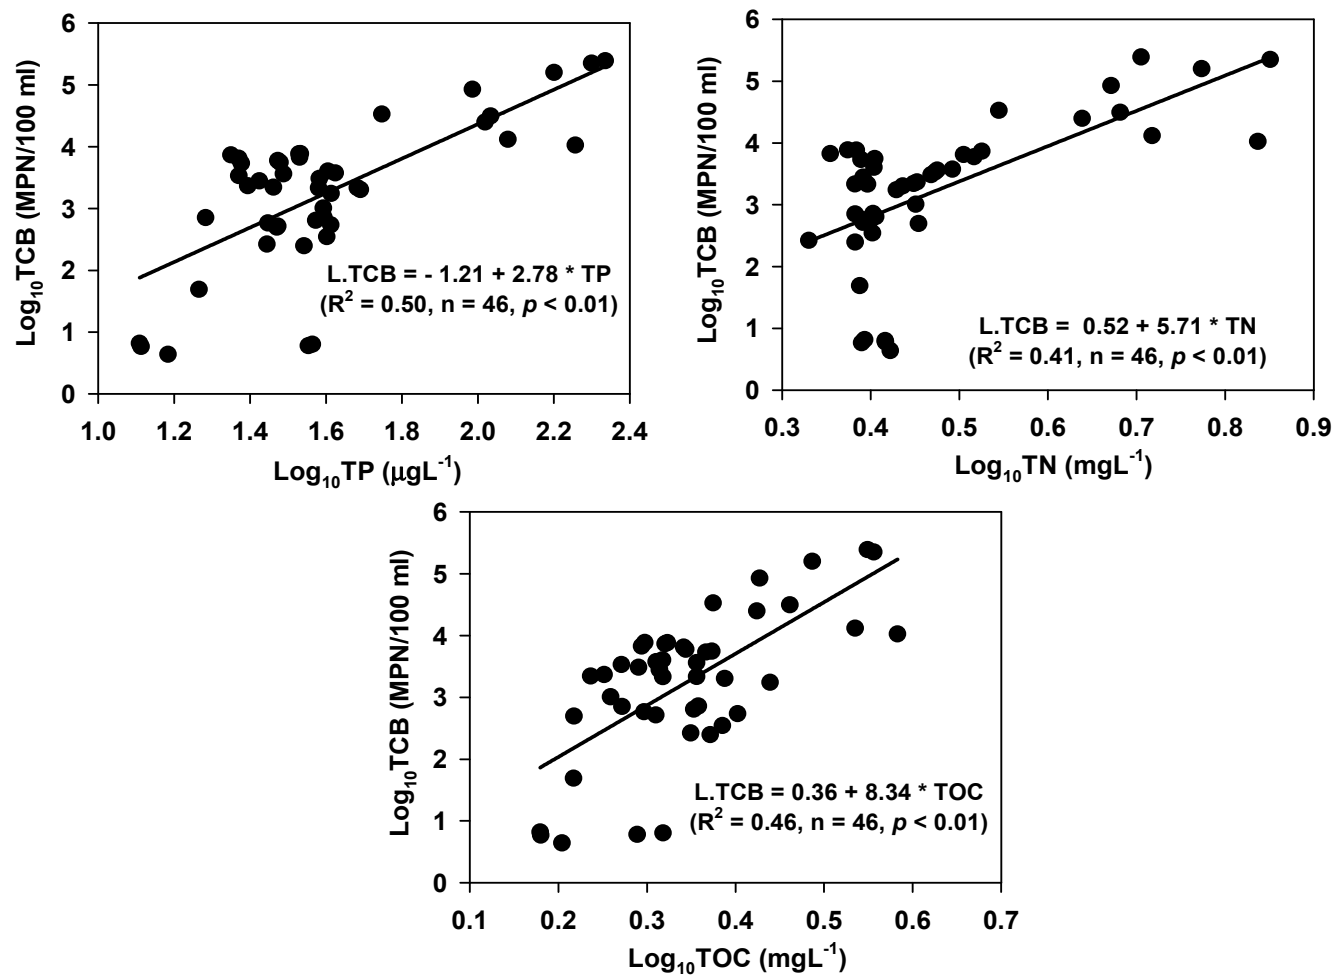

Figure S8. Influence of TP (total phosphorus), TN (total nitrogen), and TOC (total organic carbon) on TCB (total coliform bacteria) in the Han River.
